# Supplementary material
Source: PubMed Central journal article supplement (PMC1726327)
Supplement: emermedj_21_3_355__1.pdf [file emermedj_21_3_355__1.pdf]

Figure 1: Prehospital Trauma Helicopter Transport Algorithm

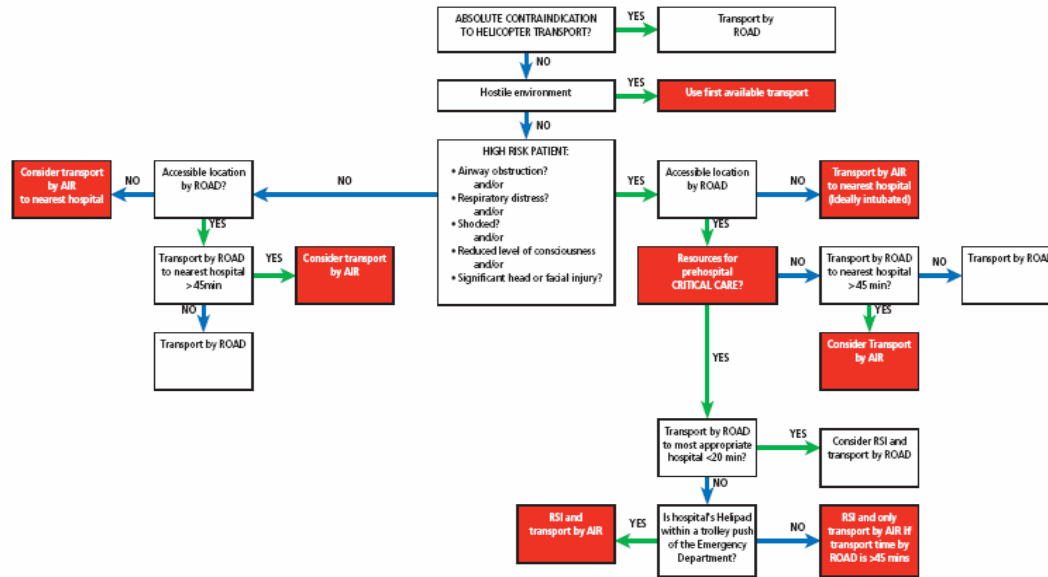

RSI: Rapid sequence induction and tracheal intubation. ED: Emergency Department

OMI 43830. Black/Ward/Lockey 2003
